# **Effective *in-vitro* inactivation of SARS-CoV-2 by commercially available mouthwashes**

Katherine Davies<sup>a</sup>, Hubert Buczkowski<sup>a</sup>, Stephen R Welch<sup>a</sup>, Nicole Green<sup>a</sup>,  
Damian Mawer<sup>b</sup>, Neil Woodford<sup>c</sup>, Allen DG Roberts<sup>a</sup>, Peter J Nixon<sup>b</sup>, David W  
Seymour<sup>b</sup>, Marian J Killip<sup>a†</sup>

<sup>a</sup>High Containment Microbiology, National Infection Service, Public Health  
England, 61 Colindale Avenue, Colindale, London, NW9 5EQ

<sup>b</sup>York Hospitals NHS Foundation Trust, Wigginton Road, York, YO31 8HE

<sup>c</sup>National Infection Service, Public Health England, 61 Colindale Avenue,  
Colindale, London, NW9 5EQ

<sup>†</sup>Corresponding author:

[Marian.Killip@phe.gov.uk](mailto:Marian.Killip@phe.gov.uk)

**Keywords** – SARS-CoV-2, COVID-19, coronavirus, mouthwash, oral rinse,  
inactivation.

## ABSTRACT

Infectious SARS-CoV-2 can be recovered from the oral cavities and saliva of COVID-19 patients with potential implications for disease transmission. Reducing viral load in patient saliva using antiviral mouthwashes may therefore have a role as a control measure in limiting virus spread, particularly in dental settings. Here, the efficacy of SARS-CoV-2 inactivation by seven commercially available mouthwashes with a range of active ingredients were evaluated *in vitro*. We demonstrate  $\geq 4.1$  to  $\geq 5.5$   $\log_{10}$  reduction in SARS-CoV-2 titre following a one minute treatment with commercially available mouthwashes containing 0.01-0.02% stabilised hypochlorous acid or 0.58% povidone iodine, and non-specialist mouthwashes with both alcohol-based and alcohol-free formulations designed for home use. In contrast, products containing 1.5% hydrogen peroxide or 0.2% chlorhexidine gluconate were ineffective against SARS-CoV-2 in these tests. This study contributes to the growing body of evidence surrounding virucidal efficacy of mouthwashes/oral rinses against SARS-CoV-2, and has important applications in reducing risk associated with aerosol generating procedures in dentistry and potentially for infection control more widely.

69

## 70 MAIN TEXT

71

72 SARS-CoV-2 is the virus responsible for causing COVID-19 (1), and infectious  
73 SARS-CoV-2 is detectable in the oral cavities and the saliva of COVID-19  
74 patients (2, 3) with potential implications for disease transmission. Aerosol-  
75 generating procedures, particularly in the dental setting, therefore pose a  
76 potential infectious risk to health care teams working in close proximity to  
77 patients while these procedures are being carried out (4). The World Health  
78 Organization recommends the use of pre-procedural mouth rinses for the  
79 reduction of SARS-CoV-2 viral load in patient saliva as a control measure for  
80 reduction of this infectious risk (5). Here, we have assessed seven different  
81 commercially available mouthwashes with a range of active ingredients for the  
82 efficacy against SARS-CoV-2 *in vitro*.

83

84 The commercial mouthwashes tested in this study are listed in Table 1. All  
85 products were stored in their original packaging according to manufacturer's  
86 instructions and were unopened prior to testing. *In vitro* SARS-CoV-2  
87 inactivation assessments were performed in a containment level 3 facility, and  
88 all virus manipulations were performed within a class III microbiological safety  
89 cabinet. Briefly, one volume of virus preparation (SARS-CoV-2 England 2  
90 strain, in tissue culture fluid [TCF] comprising Minimum Essential Media  
91 [MEM] and 5% foetal calf serum) was mixed with ten volumes of product and  
92 mixed well by inversion. Products were incubated at 20°C (+/- 2°C) for one  
93 minute, then immediately titrated in phosphate-buffered saline (PBS) to  
94 generate a ten-fold dilution series. Dilution series were directly applied to 96-  
95 well plates of Vero E6 cells to determine the 50% tissue culture infectious  
96 dose (TCID<sub>50</sub>) as previously described (6). All products were tested in  
97 triplicate, and a triplicate set of samples treated with an equivalent volume of  
98 PBS was included in each experiment as a control for virus recovery. Mean  
99 titre reductions were calculated by subtracting the mean log<sub>10</sub> titre of treated  
100 samples from the mean log<sub>10</sub> titre of PBS-treated samples. The cytotoxicity of  
101 treated samples varied between products, and a cytotoxic control sample

102 comprising one volume of PBS to ten volumes of product was evaluated in  
103 parallel and used to calculate the limit of detection for each product.

104

105 Two Listerine compositions were evaluated in this study: Listerine Advanced  
106 Defence Sensitive and alcohol-free Listerine Total Care. Both formulations  
107 reduced SARS-CoV-2 titre to below the limit of detection for the tests after a  
108 one minute treatment:  $\geq 3.5 \log_{10}$  reduction for Listerine Advanced Defence  
109 Sensitive and  $\geq 4.1 \log_{10}$  reduction for Listerine Total Care, respectively (Table  
110 1). The high level of cytotoxicity associated with Listerine Advanced Defence  
111 Sensitive meant that the reduction we could demonstrate for this product in  
112 this test was below the  $>4 \log_{10}$  reduction given in the standard for virucidal  
113 quantitative suspension tests, BS EN 14476 (7). Previously, we have  
114 conducted a wide range of chemical inactivation testing to inform risk  
115 assessments around sample processing for the COVID-19 response (6, 8);  
116 we have used purification methods extensively for these assessments to  
117 remove components that are cytotoxic in cell culture and would otherwise  
118 increase the limit of detection for treated samples. However, we have found  
119 these methods unsuitable for evaluation of short (e.g. two minutes or less)  
120 treatment times due to the additional time required for sample processing. To  
121 see if we could increase the detectable titre reduction without performing a  
122 post-treatment purification step, we tested these products using a  
123 concentrated virus preparation, generated by concentrating TCF containing  
124 virus through 100-kDa-cutoff Amicon Ultra-15 centrifugal filters. When tested  
125 against this concentrated virus, we could demonstrate  $\geq 4.2 \log_{10}$  titre  
126 reduction for Listerine Advanced Defence Sensitive and  $\geq 5.2 \log_{10}$  for  
127 Listerine Total Care. Both of these products were therefore clearly effective at  
128 inactivating SARS-CoV-2 in a TCF matrix, despite both products differing in  
129 their active ingredients. The manufacturer lists 1.4% dipotassium oxalate as  
130 the active ingredient in Listerine Advanced Defence Sensitive, while  
131 eucalyptol, thymol, menthol, sodium fluoride and zinc fluoride are given as  
132 active ingredients for Listerine Total Care, although the contribution of these  
133 particular ingredients to the antiviral activity of these mouthwashes is unclear.  
134 Alternative Listerine compositions have been evaluated for SARS-CoV-2  
135 antiviral activity by others, including Listerine Cool Mint (9, 10), Listerine

136 Antiseptic (11) and Listerine Advanced Gum Treatment (10). This study  
137 provides evidence that Listerine Advanced Defence Sensitive and Total Care  
138 formulations are similarly effective against SARS-CoV-2.

139

140 Povidone contains 0.58% povidone iodine, and reduced SARS-CoV-2 titre by  
141  $\geq 4.1 \log_{10}$  in our tests using unconcentrated TCF and  $\geq 5.2 \log_{10}$  using  
142 concentrated TCF (Table 1). This is consistent with previous studies of  
143 povidone iodine-based products, where efficacy in vitro against coronaviruses  
144 has been demonstrated, including against SARS-CoV-1 and Middle East  
145 respiratory syndrome-associated coronavirus MERS-CoV (12, 13). More  
146 recently, oral rinse products containing between 0.5% and 1.0% povidone  
147 iodine have been demonstrated to be effective against SARS-CoV-2 in vitro  
148 (9, 10, 14, 15) and in reducing viral load in the saliva of human COVID-19  
149 patients (16).

150

151 OraWize+, a product containing 0.01-0.02% hypochlorous acid (HOCl) as its  
152 active ingredient, reduced virus titre in unconcentrated TCF by  $\geq 5.5 \log_{10}$   
153 TCID<sub>50</sub>/ml, to below the limit of detection for the assay (Table 1). A potential  
154 role for hypochlorous acid-based products as oral rinses to combat SARS-  
155 CoV-2 has been proposed (17, 18), but to our knowledge this is the first *in*  
156 *vitro* evidence for efficacy of a hypochlorous acid-based mouthwash against  
157 SARS-CoV-2. It is important to note however that OraWize+ was not effective  
158 when tested against concentrated TCF (Table 1), potentially due to high levels  
159 of protein in this sample matrix, suggesting that the chemistry of this product  
160 may be affected by complex samples types. This is an observation we have  
161 also made for other hypochlorous acid-based inactivants (unpublished data)  
162 and further testing is required to determine the significance of this observation  
163 for product use.

164

165 Two chlorhexidine gluconate-based products were evaluated in this study:  
166 Corsodyl (alcohol-free) and Ecolabs Chlorhexidine Gluconate Antiseptic Wash  
167 (containing ethanol). Neither were effective at inactivating SARS-CoV-2  
168 (Table 1), consistent with previous studies demonstrating only a very small  
169 effect on SARS-CoV-2 (9, 10). Peroxyl (containing 1.5% hydrogen peroxide)

was similarly ineffective. This last observation was initially surprising considering that one minute treatment with 0.5% hydrogen peroxide has been reported to be effective against human coronavirus 229E in virus suspension tests (19) and that 1% hydrogen peroxide pre-procedural mouth rinse is recommended by the World Health Organisation (WHO) and others for reduction of infectious risks in the context of COVID-19 (4, 5). However, ours is not the only study to demonstrate minimal *in vitro* effectiveness of hydrogen peroxide-based mouth rinses against SARS-CoV-2 and the superior effectiveness of other types of oral rinses (9, 15).

The availability and stability of these products vary, and these factors may impact their utility in different settings. OraWize+ has a much shorter shelf life than other products tested (one month after opening) and must be protected from light; we have found that it can lose effectiveness when stored incorrectly (unpublished data). Povidone has a relatively short shelf life, and is not widely available in the UK (indeed, currently there is no widely commercially available povidone iodine mouthwash in the UK). In contrast, the Listerine formulations tested have a considerably longer shelf life, are far more widely available and are designed for use by the general public.

In conclusion, we have demonstrated effective inactivation of SARS-CoV-2 by Listerine Advanced Defence Sensitive and Total Care formulations, and by commercial mouthwashes containing 0.01-0.02% hypochlorous acid or 0.58% povidone iodine in *in vitro* tests using TCF. Our data support the use of these products, but not the use of hydrogen peroxide or chlorhexidine gluconate mouthwashes, for reduction of SARS-CoV-2 viral load, and thus indicate a potential use for these products in the reduction of infectious risk associated with aerosol generating dental procedures and for SARS-CoV-2 infection control more generally. Our evidence supports inclusion of several of these mouthwashes into a randomised controlled trial to evaluate their efficacy and substantivity against SARS-CoV-2 *in-vivo*.

## Conflicts of interest

The authors declare that there are no conflicts of interest.

204

## 205 **Acknowledgements**

206 The views expressed in this article are those of the authors and are not  
207 necessarily those of Public Health England, the National Health Service or the  
208 Department of Health and Social Care.

209

## 210 **REFERENCES**

211

212 1. Zhu N, Zhang D, Wang W, Li X, Yang B, Song J, et al. A Novel  
213 Coronavirus from Patients with Pneumonia in China, 2019. New England  
214 Journal of Medicine. 2020;382(8):727-33.

215

216 2. Jeong HW, Kim SM, Kim HS, Kim YI, Kim JH, Cho JY, et al. Viable  
217 SARS-CoV-2 in various specimens from COVID-19 patients. Clinical  
218 microbiology and infection : the official publication of the European Society of  
219 Clinical Microbiology and Infectious Diseases. 2020;26(11):1520-4.

220

221 3. To KK, Tsang OT, Yip CC, Chan KH, Wu TC, Chan JM, et al.  
222 Consistent Detection of 2019 Novel Coronavirus in Saliva. Clinical infectious  
223 diseases : an official publication of the Infectious Diseases Society of  
224 America. 2020;71(15):841-3.

225

226 4. Peng X, Xu X, Li Y, Cheng L, Zhou X, Ren B. Transmission routes of  
227 2019-nCoV and controls in dental practice. Int J Oral Sci. 2020;12(1):9-.

228

229 5. World Health Organization. Considerations for the provision of  
230 essential oral health services in the context of COVID-19: Interim guidance  
231 2020 [updated 3 August 2020. Available from:  
232 <https://www.who.int/publications/i/item/who-2019-nCoV-oral-health-2020.1>.

233

234 6. Welch SR, Davies KA, Buczkowski H, Hettiarachchi N, Green N,  
235 Arnold U, et al. Analysis of Inactivation of SARS-CoV-2 by Specimen  
236 Transport Media, Nucleic Acid Extraction Reagents, Detergents, and  
237 Fixatives. J Clin Microbiol. 2020;58(11).

238

239 7. British Standards Institution. Chemical disinfectants and antiseptics-  
240 Quantitative suspension test for the evaluation of virucidal activity in the  
241 medical area- Test method and requirements (Phase 2/Step 1). BSI  
242 Standards Limited; 2019.

243

244 8. Public Health England. COVID-19: PHE laboratory assessments of  
245 inactivation methods 2020 [Available from:  
246 [https://www.gov.uk/government/publications/covid-19-phe-laboratory-](https://www.gov.uk/government/publications/covid-19-phe-laboratory-assessments-of-inactivation-methods)  
247 [assessments-of-inactivation-methods](https://www.gov.uk/government/publications/covid-19-phe-laboratory-assessments-of-inactivation-methods).

248



- 249 9. Meister TL, Brüggemann Y, Todt D, Conzelmann C, Müller JA, Groß R,  
250 et al. Virucidal Efficacy of Different Oral Rinses Against Severe Acute  
251 Respiratory Syndrome Coronavirus 2. *J Infect Dis.* 2020;222(8):1289-92.  
252
- 253 10. Statkute E, Rubina A, O'Donnell VB, Thomas DW, Stanton RJ. Brief  
254 Report: The Virucidal Efficacy of Oral Rinse Components Against SARS-CoV-  
255 2 In Vitro. *bioRxiv.* 2020:2020.11.13.381079.  
256
- 257 11. Meyers C, Robison R, Milici J, Alam S, Quillen D, Goldenberg D, et al.  
258 Lowering the transmission and spread of human coronavirus. *Journal of*  
259 *Medical Virology.* 2020. In press. <https://doi.org/10.1002/jmv.26514>  
260
- 261 12. Eggers M, Koburger-Janssen T, Eickmann M, Zorn J. In Vitro  
262 Bactericidal and Virucidal Efficacy of Povidone-Iodine Gargle/Mouthwash  
263 Against Respiratory and Oral Tract Pathogens. *Infectious Diseases and*  
264 *Therapy.* 2018;7(2):249-59.  
265
- 266 13. Kariwa H, Fujii N, Takashima I. Inactivation of SARS Coronavirus by  
267 Means of Povidone-Iodine, Physical Conditions and Chemical Reagents.  
268 *Dermatology.* 2006;212(Suppl. 1):119-23.  
269
- 270 14. Anderson DE, Sivalingam V, Kang AEZ, Ananthanarayanan A,  
271 Arumugam H, Jenkins TM, et al. Povidone-Iodine Demonstrates Rapid In  
272 Vitro Virucidal Activity Against SARS-CoV-2, The Virus Causing COVID-19  
273 Disease. *Infectious diseases and therapy.* 2020;9(3):669-75.  
274
- 275 15. Bidra AS, Pelletier JS, Westover JB, Frank S, Brown SM, Tessema B.  
276 Comparison of In Vitro Inactivation of SARS CoV-2 with Hydrogen Peroxide  
277 and Povidone-Iodine Oral Antiseptic Rinses. *Journal of Prosthodontics.*  
278 2020;29(7):599-603.  
279
- 280 16. Martínez Lamas L, Diz Dios P, Pérez Rodríguez MT, Del Campo Pérez  
281 V, Cabrera Alvargonzalez JJ, López Domínguez AM, et al. Is povidone iodine  
282 mouthwash effective against SARS-CoV-2? First in vivo tests. *Oral Diseases.*  
283 <https://doi.org/10.1111/odi.13526>  
284
- 285 17. Block MS, Rowan BG. Hypochlorous Acid: A Review. *J Oral Maxillofac*  
286 *Surg.* 2020;78(9):1461-6.  
287
- 288 18. Banakar M, Bagheri Lankarani K, Jafarpour D, Moayedi S, Banakar  
289 MH, MohammadSadeghi A. COVID-19 transmission risk and protective  
290 protocols in dentistry: a systematic review. *BMC Oral Health.* 2020;20(1):275.  
291
- 292 19. Kampf G, Todt D, Pfaender S, Steinmann E. Persistence of  
293 coronaviruses on inanimate surfaces and their inactivation with biocidal  
294 agents. *The Journal of hospital infection.* 2020;104(3):246-51.  
295
- 296



297

298

299 **Table 1: SARS-CoV-2 inactivation by commercial mouthwashes**

| Product                                                           | Manufacturer                   | Active ingredient/s <sup>†</sup>                            | Mean titre reduction;<br>log <sub>10</sub> TCID <sub>50</sub> /ml (95% CI) |                     |
|-------------------------------------------------------------------|--------------------------------|-------------------------------------------------------------|----------------------------------------------------------------------------|---------------------|
|                                                                   |                                |                                                             | TCF<br>unconcentrated                                                      | TCF<br>concentrated |
| Chlorhexidine Gluconate Antiseptic Mouthwash (Peppermint Flavour) | Ecolabs                        | 0.2% chlorhexidine gluconate (formulation contains ethanol) | 0.5 (0.1-0.9)                                                              | Not tested          |
| Corsodyl (Alcohol Free Mint Flavour)                              | GlaxoSmithKline                | 0.2% chlorhexidine gluconate (alcohol-free formulation)     | 0.4 (-0.2-0.7)                                                             | Not tested          |
| Listerine Advanced Defence Sensitive                              | Johnson & Johnson              | 1.4% dipotassium oxalate (alcohol-free formulation)         | ≥ 3.5** (3.2-3.8)                                                          | ≥ 4.2** (3.9-4.4)   |
| Listerine Total Care                                              | Johnson & Johnson              | Eucalyptol, thymol, menthol, sodium fluoride, zinc fluoride | ≥ 4.1* (3.8-4.4)                                                           | ≥ 5.2* (4.9-5.4)    |
| OraWize+                                                          | Aqualution Systems             | 0.01-0.02% stabilised hypochlorous acid                     | ≥ 5.5 <sup>†</sup> (5.2-5.8)                                               | 0.4 (0.0-0.8)       |
| Peroxyl                                                           | Colgate                        | 1.5% hydrogen peroxide                                      | 0.2 (-0.1-0.5)                                                             | Not tested          |
| Povident                                                          | Huddersfield Pharmacy Specials | 0.58% povidone iodine                                       | ≥ 4.1* (3.8-4.4)                                                           | ≥ 5.2* (4.9-5.4)    |

300

301 <sup>†</sup>Principal active ingredient/s listed by the manufacturer only are given; refer to manufacturer documents for full ingredients

302 <sup>†</sup>Limit of detection was 0.7 log<sub>10</sub> TCID<sub>50</sub>/ml

303 <sup>\*</sup>Limit of detection was 1.7 log<sub>10</sub> TCID<sub>50</sub>/ml due to product cytotoxicity

304 <sup>\*\*</sup>Limit of detection was 2.7 log<sub>10</sub> TCID<sub>50</sub>/ml due to product cytotoxicity

305

306
